# Supplementary material
Source: publisher figshare collection journal article supplement (https://acs.figshare.com/ndownloader/files/4366315)
Supplement: Supplementary file 1 [file 4366315]

 
data_3301a 
 
_audit_creation_method            SHELXL-97 
_chemical_name_systematic 
; 
 ? 
; 
_chemical_name_common             ? 
_chemical_melting_point           ? 
_chemical_formula_moiety          ? 
_chemical_formula_sum 
 'Au Ge2 In3 Yb3' 
_chemical_formula_weight          1205.73 
 
loop_ 
 _atom_type_symbol 
 _atom_type_description 
 _atom_type_scat_dispersion_real 
 _atom_type_scat_dispersion_imag 
 _atom_type_scat_source 
 'Ge'  'Ge'   0.1547   1.8001 
 'International Tables Vol C Tables 4.2.6.8 and 6.1.1.4' 
 'In'  'In'  -0.7276   1.3100 
 'International Tables Vol C Tables 4.2.6.8 and 6.1.1.4' 
 'Yb'  'Yb'  -0.3850   5.5486 
 'International Tables Vol C Tables 4.2.6.8 and 6.1.1.4' 
 'Au'  'Au'  -2.0133   8.8022 
 'International Tables Vol C Tables 4.2.6.8 and 6.1.1.4' 
 
_symmetry_cell_setting            Hexagonal 
_symmetry_space_group_name_H-M    P-62m 
 
loop_ 
 _symmetry_equiv_pos_as_xyz 
 'x, y, z' 
 '-y, x-y, z' 
 '-x+y, -x, z' 
 'x, y, -z' 
 '-y, x-y, -z' 
 '-x+y, -x, -z' 
 'y, x, -z' 
 'x-y, -y, -z' 
 '-x, -x+y, -z' 
 'y, x, z' 
 'x-y, -y, z' 
 '-x, -x+y, z' 
 
_cell_length_a                    7.3153(8) 
_cell_length_b                    7.3153(8) 
_cell_length_c                    4.4210(5) 
_cell_angle_alpha                 90.00 
_cell_angle_beta                  90.00 
_cell_angle_gamma                 120.00 
_cell_volume                      204.89(4) 
_cell_formula_units_Z             1 
_cell_measurement_temperature     293(2) 
_cell_measurement_reflns_used     ? 
_cell_measurement_theta_min       ? 
_cell_measurement_theta_max       ? 
 
_exptl_crystal_description        ? 
_exptl_crystal_colour             ? 
_exptl_crystal_size_max           ? 
_exptl_crystal_size_mid           ? 
_exptl_crystal_size_min           ? 
_exptl_crystal_density_meas       ? 
_exptl_crystal_density_diffrn     9.772 
_exptl_crystal_density_method     'not measured' 
_exptl_crystal_F_000              500 
_exptl_absorpt_coefficient_mu     67.086 
_exptl_absorpt_correction_type    ? 
_exptl_absorpt_correction_T_min   ? 
_exptl_absorpt_correction_T_max   ? 
_exptl_absorpt_process_details    ? 
 
_exptl_special_details 
; 
 ? 
; 
 
_diffrn_ambient_temperature       293(2) 
_diffrn_radiation_wavelength      0.71073 
_diffrn_radiation_type            MoK\a 
_diffrn_radiation_source          'fine-focus sealed tube' 
_diffrn_radiation_monochromator   graphite 
_diffrn_measurement_device_type   ? 
_diffrn_measurement_method        ? 
_diffrn_detector_area_resol_mean  ? 
_diffrn_standards_number          ? 
_diffrn_standards_interval_count  ? 
_diffrn_standards_interval_time   ? 
_diffrn_standards_decay_%         ? 
_diffrn_reflns_number             2272 
_diffrn_reflns_av_R_equivalents   0.0262 
_diffrn_reflns_av_sigmaI/netI     0.0129 
_diffrn_reflns_limit_h_min        -9 
_diffrn_reflns_limit_h_max        9 
_diffrn_reflns_limit_k_min        -9 
_diffrn_reflns_limit_k_max        9 
_diffrn_reflns_limit_l_min        -5 
_diffrn_reflns_limit_l_max        5 
_diffrn_reflns_theta_min          3.22 
_diffrn_reflns_theta_max          28.25 
_reflns_number_total              213 
_reflns_number_gt                 213 
_reflns_threshold_expression      >2sigma(I) 
 
_computing_data_collection        ? 
_computing_cell_refinement        ? 
_computing_data_reduction         ? 
_computing_structure_solution     'SHELXS-97 (Sheldrick, 1990)' 
_computing_structure_refinement   'SHELXL-97 (Sheldrick, 1997)' 
_computing_molecular_graphics     ? 
_computing_publication_material   ? 
 
_refine_special_details 
; 
 Refinement of F^2^ against ALL reflections.  The weighted R-factor wR and 
 goodness of fit S are based on F^2^, conventional R-factors R are based 
 on F, with F set to zero for negative F^2^. The threshold expression of 
 F^2^ > 2sigma(F^2^) is used only for calculating R-factors(gt) etc. and is 
 not relevant to the choice of reflections for refinement.  R-factors based 
 on F^2^ are statistically about twice as large as those based on F, and R- 
 factors based on ALL data will be even larger. 
; 
 
_refine_ls_structure_factor_coef  Fsqd  
_refine_ls_matrix_type            full 
_refine_ls_weighting_scheme       calc  
_refine_ls_weighting_details 
 'calc w=1/[\s^2^(Fo^2^)+(0.0355P)^2^+20.0046P] where P=(Fo^2^+2Fc^2^)/3' 
_atom_sites_solution_primary      direct 
_atom_sites_solution_secondary    difmap 
_atom_sites_solution_hydrogens    geom 
_refine_ls_hydrogen_treatment     mixed 
_refine_ls_extinction_method      SHELXL 
_refine_ls_extinction_coef        0.0012(6) 
_refine_ls_extinction_expression 
 'Fc^*^=kFc[1+0.001xFc^2^\l^3^/sin(2\q)]^-1/4^' 
_refine_ls_abs_structure_details 
 'Flack H D (1983), Acta Cryst. A39, 876-881' 
_refine_ls_abs_structure_Flack    0.49(4) 
_refine_ls_number_reflns          213 
_refine_ls_number_parameters      14 
_refine_ls_number_restraints      0 
_refine_ls_R_factor_all           0.0298 
_refine_ls_R_factor_gt            0.0298 
_refine_ls_wR_factor_ref          0.0746 
_refine_ls_wR_factor_gt           0.0746 
_refine_ls_goodness_of_fit_ref    1.077 
_refine_ls_restrained_S_all       1.077 
_refine_ls_shift/su_max           0.000 
_refine_ls_shift/su_mean          0.000 
 
loop_ 
 _atom_site_label 
 _atom_site_type_symbol 
 _atom_site_fract_x 
 _atom_site_fract_y 
 _atom_site_fract_z 
 _atom_site_U_iso_or_equiv 
 _atom_site_adp_type 
 _atom_site_occupancy 
 _atom_site_symmetry_multiplicity 
 _atom_site_calc_flag 
 _atom_site_refinement_flags 
 _atom_site_disorder_assembly 
 _atom_site_disorder_group 
Yb Yb 0.4197(2) 0.0000 0.5000 0.0086(4) Uani 1 4 d S . . 
Au Au 0.0000 0.0000 0.5000 0.0149(5) Uani 1 12 d S . . 
In In 0.7512(3) 0.0000 0.0000 0.0132(5) Uani 1 4 d S . . 
Ge Ge 0.3333 -0.3333 0.0000 0.0081(8) Uani 1 6 d S . . 
 
loop_ 
 _atom_site_aniso_label 
 _atom_site_aniso_U_11 
 _atom_site_aniso_U_22 
 _atom_site_aniso_U_33 
 _atom_site_aniso_U_23 
 _atom_site_aniso_U_13 
 _atom_site_aniso_U_12 
Yb 0.0093(5) 0.0081(6) 0.0079(6) 0.000 0.000 0.0041(3) 
Au 0.0166(7) 0.0166(7) 0.0115(10) 0.000 0.000 0.0083(3) 
In 0.0113(8) 0.0125(11) 0.0160(10) 0.000 0.000 0.0063(6) 
Ge 0.0087(11) 0.0087(11) 0.0069(16) 0.000 0.000 0.0044(5) 
 
_geom_special_details 
; 
 All esds (except the esd in the dihedral angle between two l.s. planes) 
 are estimated using the full covariance matrix.  The cell esds are taken 
 into account individually in the estimation of esds in distances, angles 
 and torsion angles; correlations between esds in cell parameters are only 
 used when they are defined by crystal symmetry.  An approximate (isotropic) 
 treatment of cell esds is used for estimating esds involving l.s. planes. 
; 
 
loop_ 
 _geom_bond_atom_site_label_1 
 _geom_bond_atom_site_label_2 
 _geom_bond_distance 
 _geom_bond_site_symmetry_2 
 _geom_bond_publ_flag 
Yb Au 3.0700(15) . ? 
Yb Ge 3.1130(4) 7_656 ? 
Yb Ge 3.1130(4) 7_655 ? 
Yb Ge 3.1130(4) . ? 
Yb Ge 3.1131(4) 1_556 ? 
Yb In 3.2815(19) . ? 
Yb In 3.2815(19) 1_556 ? 
Yb In 3.4694(9) 2_545 ? 
Yb In 3.4694(9) 2_546 ? 
Yb In 3.4694(9) 3_666 ? 
Yb In 3.4694(9) 3_665 ? 
Yb Yb 3.7966(8) 3_655 ? 
Au In 2.8634(13) 3_666 ? 
Au In 2.8634(13) 1_455 ? 
Au In 2.8633(13) 3_665 ? 
Au In 2.8633(13) 1_456 ? 
Au In 2.8634(13) 2_545 ? 
Au In 2.8634(13) 2_546 ? 
Au Yb 3.0700(15) 2 ? 
Au Yb 3.0701(15) 3 ? 
In Ge 2.7993(14) 7_655 ? 
In Ge 2.7993(14) . ? 
In Au 2.8633(13) 1_655 ? 
In Au 2.8633(13) 1_654 ? 
In In 3.152(4) 3_765 ? 
In In 3.152(4) 2_645 ? 
In Yb 3.2815(19) 1_554 ? 
In Yb 3.4693(9) 2_655 ? 
In Yb 3.4693(9) 2_654 ? 
In Yb 3.4694(9) 3_654 ? 
In Yb 3.4694(9) 3_655 ? 
Ge In 2.7993(14) 2_545 ? 
Ge In 2.7993(14) 3_655 ? 
Ge Yb 3.1130(4) 3_655 ? 
Ge Yb 3.1130(4) 3_654 ? 
Ge Yb 3.1130(4) 2_544 ? 
Ge Yb 3.1130(4) 2_545 ? 
Ge Yb 3.1131(4) 1_554 ? 
 
loop_ 
 _geom_angle_atom_site_label_1 
 _geom_angle_atom_site_label_2 
 _geom_angle_atom_site_label_3 
 _geom_angle 
 _geom_angle_site_symmetry_1 
 _geom_angle_site_symmetry_3 
 _geom_angle_publ_flag 
Au Yb Ge 100.88(3) . 7_656 ? 
Au Yb Ge 100.88(3) . 7_655 ? 
Ge Yb Ge 90.483(13) 7_656 7_655 ? 
Au Yb Ge 100.88(3) . . ? 
Ge Yb Ge 158.24(5) 7_656 . ? 
Ge Yb Ge 85.430(12) 7_655 . ? 
Au Yb Ge 100.88(3) . 1_556 ? 
Ge Yb Ge 85.430(13) 7_656 1_556 ? 
Ge Yb Ge 158.24(5) 7_655 1_556 ? 
Ge Yb Ge 90.482(14) . 1_556 ? 
Au Yb In 137.65(3) . . ? 
Ge Yb In 109.81(4) 7_656 . ? 
Ge Yb In 51.842(18) 7_655 . ? 
Ge Yb In 51.842(18) . . ? 
Ge Yb In 109.80(4) 1_556 . ? 
Au Yb In 137.65(3) . 1_556 ? 
Ge Yb In 51.842(18) 7_656 1_556 ? 
Ge Yb In 109.81(4) 7_655 1_556 ? 
Ge Yb In 109.81(4) . 1_556 ? 
Ge Yb In 51.842(18) 1_556 1_556 ? 
In Yb In 84.70(6) . 1_556 ? 
Au Yb In 51.49(3) . 2_545 ? 
Ge Yb In 151.42(5) 7_656 2_545 ? 
Ge Yb In 88.47(2) 7_655 2_545 ? 
Ge Yb In 49.98(3) . 2_545 ? 
Ge Yb In 105.17(3) 1_556 2_545 ? 
In Yb In 91.77(4) . 2_545 ? 
In Yb In 152.79(3) 1_556 2_545 ? 
Au Yb In 51.49(3) . 2_546 ? 
Ge Yb In 88.47(2) 7_656 2_546 ? 
Ge Yb In 151.42(5) 7_655 2_546 ? 
Ge Yb In 105.17(3) . 2_546 ? 
Ge Yb In 49.98(3) 1_556 2_546 ? 
In Yb In 152.79(3) . 2_546 ? 
In Yb In 91.77(4) 1_556 2_546 ? 
In Yb In 79.16(3) 2_545 2_546 ? 
Au Yb In 51.49(3) . 3_666 ? 
Ge Yb In 49.98(3) 7_656 3_666 ? 
Ge Yb In 105.17(3) 7_655 3_666 ? 
Ge Yb In 151.42(5) . 3_666 ? 
Ge Yb In 88.47(2) 1_556 3_666 ? 
In Yb In 152.79(3) . 3_666 ? 
In Yb In 91.77(4) 1_556 3_666 ? 
In Yb In 102.99(6) 2_545 3_666 ? 
In Yb In 54.04(7) 2_546 3_666 ? 
Au Yb In 51.49(3) . 3_665 ? 
Ge Yb In 105.17(3) 7_656 3_665 ? 
Ge Yb In 49.98(3) 7_655 3_665 ? 
Ge Yb In 88.47(2) . 3_665 ? 
Ge Yb In 151.42(5) 1_556 3_665 ? 
In Yb In 91.77(4) . 3_665 ? 
In Yb In 152.79(3) 1_556 3_665 ? 
In Yb In 54.04(7) 2_545 3_665 ? 
In Yb In 102.99(6) 2_546 3_665 ? 
In Yb In 79.16(3) 3_666 3_665 ? 
Au Yb Yb 135.55(4) . 3_655 ? 
Ge Yb Yb 109.90(5) 7_656 3_655 ? 
Ge Yb Yb 109.90(5) 7_655 3_655 ? 
Ge Yb Yb 52.426(5) . 3_655 ? 
Ge Yb Yb 52.425(5) 1_556 3_655 ? 
In Yb Yb 58.16(3) . 3_655 ? 
In Yb Yb 58.16(3) 1_556 3_655 ? 
In Yb Yb 97.26(4) 2_545 3_655 ? 
In Yb Yb 97.26(4) 2_546 3_655 ? 
In Yb Yb 139.694(11) 3_666 3_655 ? 
In Yb Yb 139.694(11) 3_665 3_655 ? 
In Au In 142.94(3) 3_666 1_455 ? 
In Au In 101.07(6) 3_666 3_665 ? 
In Au In 66.80(5) 1_455 3_665 ? 
In Au In 66.80(5) 3_666 1_456 ? 
In Au In 101.07(6) 1_455 1_456 ? 
In Au In 142.94(3) 3_665 1_456 ? 
In Au In 142.94(3) 3_666 2_545 ? 
In Au In 66.80(5) 1_455 2_545 ? 
In Au In 66.80(5) 3_665 2_545 ? 
In Au In 142.94(3) 1_456 2_545 ? 
In Au In 66.80(5) 3_666 2_546 ? 
In Au In 142.94(3) 1_455 2_546 ? 
In Au In 142.94(3) 3_665 2_546 ? 
In Au In 66.80(5) 1_456 2_546 ? 
In Au In 101.07(6) 2_545 2_546 ? 
In Au Yb 71.469(13) 3_666 2 ? 
In Au Yb 71.469(13) 1_455 2 ? 
In Au Yb 71.469(13) 3_665 2 ? 
In Au Yb 71.469(13) 1_456 2 ? 
In Au Yb 129.47(3) 2_545 2 ? 
In Au Yb 129.47(3) 2_546 2 ? 
In Au Yb 71.470(13) 3_666 . ? 
In Au Yb 129.47(3) 1_455 . ? 
In Au Yb 71.470(13) 3_665 . ? 
In Au Yb 129.47(3) 1_456 . ? 
In Au Yb 71.469(13) 2_545 . ? 
In Au Yb 71.469(13) 2_546 . ? 
Yb Au Yb 120.0 2 . ? 
In Au Yb 129.47(3) 3_666 3 ? 
In Au Yb 71.469(13) 1_455 3 ? 
In Au Yb 129.47(3) 3_665 3 ? 
In Au Yb 71.469(13) 1_456 3 ? 
In Au Yb 71.469(13) 2_545 3 ? 
In Au Yb 71.469(13) 2_546 3 ? 
Yb Au Yb 120.0 2 3 ? 
Yb Au Yb 120.0 . 3 ? 
Ge In Ge 97.94(6) 7_655 . ? 
Ge In Au 114.661(3) 7_655 1_655 ? 
Ge In Au 114.662(3) . 1_655 ? 
Ge In Au 114.661(2) 7_655 1_654 ? 
Ge In Au 114.662(3) . 1_654 ? 
Au In Au 101.07(6) 1_655 1_654 ? 
Ge In In 101.03(3) 7_655 3_765 ? 
Ge In In 161.03(3) . 3_765 ? 
Au In In 56.60(3) 1_655 3_765 ? 
Au In In 56.60(3) 1_654 3_765 ? 
Ge In In 161.03(3) 7_655 2_645 ? 
Ge In In 101.03(3) . 2_645 ? 
Au In In 56.60(3) 1_655 2_645 ? 
Au In In 56.60(3) 1_654 2_645 ? 
In In In 60.0 3_765 2_645 ? 
Ge In Yb 60.98(3) 7_655 1_554 ? 
Ge In Yb 60.98(3) . 1_554 ? 
Au In Yb 171.81(6) 1_655 1_554 ? 
Au In Yb 87.12(2) 1_654 1_554 ? 
In In Yb 129.80(2) 3_765 1_554 ? 
In In Yb 129.80(2) 2_645 1_554 ? 
Ge In Yb 60.98(3) 7_655 . ? 
Ge In Yb 60.98(3) . . ? 
Au In Yb 87.12(2) 1_655 . ? 
Au In Yb 171.81(6) 1_654 . ? 
In In Yb 129.80(2) 3_765 . ? 
In In Yb 129.80(2) 2_645 . ? 
Yb In Yb 84.70(6) 1_554 . ? 
Ge In Yb 58.39(2) 7_655 2_655 ? 
Ge In Yb 129.20(4) . 2_655 ? 
Au In Yb 57.04(2) 1_655 2_655 ? 
Au In Yb 116.08(4) 1_654 2_655 ? 
In In Yb 62.98(3) 3_765 2_655 ? 
In In Yb 108.18(4) 2_645 2_655 ? 
Yb In Yb 119.34(4) 1_554 2_655 ? 
Yb In Yb 68.38(2) . 2_655 ? 
Ge In Yb 58.39(2) 7_655 2_654 ? 
Ge In Yb 129.20(4) . 2_654 ? 
Au In Yb 116.08(4) 1_655 2_654 ? 
Au In Yb 57.04(2) 1_654 2_654 ? 
In In Yb 62.98(3) 3_765 2_654 ? 
In In Yb 108.18(4) 2_645 2_654 ? 
Yb In Yb 68.38(2) 1_554 2_654 ? 
Yb In Yb 119.34(4) . 2_654 ? 
Yb In Yb 79.16(3) 2_655 2_654 ? 
Ge In Yb 129.20(4) 7_655 3_654 ? 
Ge In Yb 58.39(2) . 3_654 ? 
Au In Yb 116.08(4) 1_655 3_654 ? 
Au In Yb 57.04(2) 1_654 3_654 ? 
In In Yb 108.18(4) 3_765 3_654 ? 
In In Yb 62.98(3) 2_645 3_654 ? 
Yb In Yb 68.38(2) 1_554 3_654 ? 
Yb In Yb 119.33(4) . 3_654 ? 
Yb In Yb 170.58(7) 2_655 3_654 ? 
Yb In Yb 100.05(3) 2_654 3_654 ? 
Ge In Yb 129.20(4) 7_655 3_655 ? 
Ge In Yb 58.39(2) . 3_655 ? 
Au In Yb 57.04(2) 1_655 3_655 ? 
Au In Yb 116.08(4) 1_654 3_655 ? 
In In Yb 108.18(4) 3_765 3_655 ? 
In In Yb 62.98(3) 2_645 3_655 ? 
Yb In Yb 119.34(4) 1_554 3_655 ? 
Yb In Yb 68.38(2) . 3_655 ? 
Yb In Yb 100.05(3) 2_655 3_655 ? 
Yb In Yb 170.58(7) 2_654 3_655 ? 
Yb In Yb 79.16(3) 3_654 3_655 ? 
In Ge In 120.0 2_545 3_655 ? 
In Ge In 120.0 2_545 . ? 
In Ge In 120.0 3_655 . ? 
In Ge Yb 134.657(9) 2_545 3_655 ? 
In Ge Yb 67.18(3) 3_655 3_655 ? 
In Ge Yb 71.64(3) . 3_655 ? 
In Ge Yb 134.657(9) 2_545 3_654 ? 
In Ge Yb 67.18(3) 3_655 3_654 ? 
In Ge Yb 71.64(3) . 3_654 ? 
Yb Ge Yb 90.483(14) 3_655 3_654 ? 
In Ge Yb 71.64(3) 2_545 . ? 
In Ge Yb 134.658(9) 3_655 . ? 
In Ge Yb 67.18(3) . . ? 
Yb Ge Yb 75.149(11) 3_655 . ? 
Yb Ge Yb 138.773(5) 3_654 . ? 
In Ge Yb 67.18(3) 2_545 2_544 ? 
In Ge Yb 71.64(3) 3_655 2_544 ? 
In Ge Yb 134.658(8) . 2_544 ? 
Yb Ge Yb 138.773(5) 3_655 2_544 ? 
Yb Ge Yb 75.148(11) 3_654 2_544 ? 
Yb Ge Yb 138.773(5) . 2_544 ? 
In Ge Yb 67.18(3) 2_545 2_545 ? 
In Ge Yb 71.64(3) 3_655 2_545 ? 
In Ge Yb 134.658(9) . 2_545 ? 
Yb Ge Yb 75.148(10) 3_655 2_545 ? 
Yb Ge Yb 138.773(5) 3_654 2_545 ? 
Yb Ge Yb 75.149(10) . 2_545 ? 
Yb Ge Yb 90.482(14) 2_544 2_545 ? 
In Ge Yb 71.64(3) 2_545 1_554 ? 
In Ge Yb 134.658(9) 3_655 1_554 ? 
In Ge Yb 67.18(3) . 1_554 ? 
Yb Ge Yb 138.773(5) 3_655 1_554 ? 
Yb Ge Yb 75.148(10) 3_654 1_554 ? 
Yb Ge Yb 90.482(14) . 1_554 ? 
Yb Ge Yb 75.149(10) 2_544 1_554 ? 
Yb Ge Yb 138.773(5) 2_545 1_554 ? 
 
_diffrn_measured_fraction_theta_max    0.992 
_diffrn_reflns_theta_full              28.25 
_diffrn_measured_fraction_theta_full   0.992 
_refine_diff_density_max    1.723 
_refine_diff_density_min   -1.777 
_refine_diff_density_rms    0.355 

#===END

 
data_31522dt 
 
_audit_creation_method            SHELXL-97 
_chemical_name_systematic 
; 
 ? 
; 
_chemical_name_common             ? 
_chemical_melting_point           ? 
_chemical_formula_moiety          ? 
_chemical_formula_sum 
 'Au3 In3 Yb3' 
_chemical_formula_weight          1454.48 
 
loop_ 
 _atom_type_symbol 
 _atom_type_description 
 _atom_type_scat_dispersion_real 
 _atom_type_scat_dispersion_imag 
 _atom_type_scat_source 
 'In'  'In'  -0.7276   1.3100 
 'International Tables Vol C Tables 4.2.6.8 and 6.1.1.4' 
 'Yb'  'Yb'  -0.3850   5.5486 
 'International Tables Vol C Tables 4.2.6.8 and 6.1.1.4' 
 'Au'  'Au'  -2.0133   8.8022 
 'International Tables Vol C Tables 4.2.6.8 and 6.1.1.4' 
 
_symmetry_cell_setting            Hexagonal 
_symmetry_space_group_name_H-M    P-62m 
 
loop_ 
 _symmetry_equiv_pos_as_xyz 
 'x, y, z' 
 '-y, x-y, z' 
 '-x+y, -x, z' 
 'x, y, -z' 
 '-y, x-y, -z' 
 '-x+y, -x, -z' 
 'y, x, -z' 
 'x-y, -y, -z' 
 '-x, -x+y, -z' 
 'y, x, z' 
 'x-y, -y, z' 
 '-x, -x+y, z' 
 
_cell_length_a                    7.7127(11) 
_cell_length_b                    7.7127(11) 
_cell_length_c                    4.0294(8) 
_cell_angle_alpha                 90.00 
_cell_angle_beta                  90.00 
_cell_angle_gamma                 120.00 
_cell_volume                      207.58(6) 
_cell_formula_units_Z             1 
_cell_measurement_temperature     293(2) 
_cell_measurement_reflns_used     ? 
_cell_measurement_theta_min       ? 
_cell_measurement_theta_max       ? 
 
_exptl_crystal_description        ? 
_exptl_crystal_colour             ? 
_exptl_crystal_size_max           ? 
_exptl_crystal_size_mid           ? 
_exptl_crystal_size_min           ? 
_exptl_crystal_density_meas       ? 
_exptl_crystal_density_diffrn     11.635 
_exptl_crystal_density_method     'not measured' 
_exptl_crystal_F_000              594 
_exptl_absorpt_coefficient_mu     94.272 
_exptl_absorpt_correction_type    ? 
_exptl_absorpt_correction_T_min   ? 
_exptl_absorpt_correction_T_max   ? 
_exptl_absorpt_process_details    ? 
 
_exptl_special_details 
; 
 ? 
; 
 
_diffrn_ambient_temperature       293(2) 
_diffrn_radiation_wavelength      0.71073 
_diffrn_radiation_type            MoK\a 
_diffrn_radiation_source          'fine-focus sealed tube' 
_diffrn_radiation_monochromator   graphite 
_diffrn_measurement_device_type   ? 
_diffrn_measurement_method        ? 
_diffrn_detector_area_resol_mean  ? 
_diffrn_standards_number          ? 
_diffrn_standards_interval_count  ? 
_diffrn_standards_interval_time   ? 
_diffrn_standards_decay_%         ? 
_diffrn_reflns_number             2949 
_diffrn_reflns_av_R_equivalents   0.1339 
_diffrn_reflns_av_sigmaI/netI     0.0534 
_diffrn_reflns_limit_h_min        -12 
_diffrn_reflns_limit_h_max        12 
_diffrn_reflns_limit_k_min        -12 
_diffrn_reflns_limit_k_max        12 
_diffrn_reflns_limit_l_min        -5 
_diffrn_reflns_limit_l_max        6 
_diffrn_reflns_theta_min          5.06 
_diffrn_reflns_theta_max          34.27 
_reflns_number_total              363 
_reflns_number_gt                 356 
_reflns_threshold_expression      >2sigma(I) 
 
_computing_data_collection        ? 
_computing_cell_refinement        ? 
_computing_data_reduction         ? 
_computing_structure_solution     'SHELXS-97 (Sheldrick, 1990)' 
_computing_structure_refinement   'SHELXL-97 (Sheldrick, 1997)' 
_computing_molecular_graphics     ? 
_computing_publication_material   ? 
 
_refine_special_details 
; 
 Refinement of F^2^ against ALL reflections.  The weighted R-factor wR and 
 goodness of fit S are based on F^2^, conventional R-factors R are based 
 on F, with F set to zero for negative F^2^. The threshold expression of 
 F^2^ > 2sigma(F^2^) is used only for calculating R-factors(gt) etc. and is 
 not relevant to the choice of reflections for refinement.  R-factors based 
 on F^2^ are statistically about twice as large as those based on F, and R- 
 factors based on ALL data will be even larger. 
; 
 
_refine_ls_structure_factor_coef  Fsqd  
_refine_ls_matrix_type            full 
_refine_ls_weighting_scheme       calc  
_refine_ls_weighting_details 
 'calc w=1/[\s^2^(Fo^2^)+(0.0380P)^2^+13.5582P] where P=(Fo^2^+2Fc^2^)/3' 
_atom_sites_solution_primary      direct 
_atom_sites_solution_secondary    difmap 
_atom_sites_solution_hydrogens    geom 
_refine_ls_hydrogen_treatment     mixed 
_refine_ls_extinction_method      SHELXL 
_refine_ls_extinction_coef        0.0037(9) 
_refine_ls_extinction_expression 
 'Fc^*^=kFc[1+0.001xFc^2^\l^3^/sin(2\q)]^-1/4^' 
_refine_ls_abs_structure_details 
 'Flack H D (1983), Acta Cryst. A39, 876-881' 
_refine_ls_abs_structure_Flack    0.00 
_refine_ls_number_reflns          363 
_refine_ls_number_parameters      14 
_refine_ls_number_restraints      0 
_refine_ls_R_factor_all           0.0432 
_refine_ls_R_factor_gt            0.0418 
_refine_ls_wR_factor_ref          0.1046 
_refine_ls_wR_factor_gt           0.1039 
_refine_ls_goodness_of_fit_ref    1.192 
_refine_ls_restrained_S_all       1.192 
_refine_ls_shift/su_max           0.000 
_refine_ls_shift/su_mean          0.000 
 
loop_ 
 _atom_site_label 
 _atom_site_type_symbol 
 _atom_site_fract_x 
 _atom_site_fract_y 
 _atom_site_fract_z 
 _atom_site_U_iso_or_equiv 
 _atom_site_adp_type 
 _atom_site_occupancy 
 _atom_site_symmetry_multiplicity 
 _atom_site_calc_flag 
 _atom_site_refinement_flags 
 _atom_site_disorder_assembly 
 _atom_site_disorder_group 
Yb Yb 0.40685(19) 0.0000 0.5000 0.0109(3) Uani 1 4 d S . . 
Au1 Au 0.0000 0.0000 0.5000 0.0123(4) Uani 1 12 d S . . 
Au2 Au 0.3333 -0.3333 0.0000 0.0110(3) Uani 1 6 d S . . 
In In 0.7416(3) 0.0000 0.0000 0.0096(4) Uani 1 4 d S . . 
 
loop_ 
 _atom_site_aniso_label 
 _atom_site_aniso_U_11 
 _atom_site_aniso_U_22 
 _atom_site_aniso_U_33 
 _atom_site_aniso_U_23 
 _atom_site_aniso_U_13 
 _atom_site_aniso_U_12 
Yb 0.0088(4) 0.0097(5) 0.0146(6) 0.000 0.000 0.0048(2) 
Au1 0.0108(5) 0.0108(5) 0.0152(9) 0.000 0.000 0.0054(2) 
Au2 0.0087(4) 0.0087(4) 0.0158(6) 0.000 0.000 0.00433(18) 
In 0.0072(6) 0.0070(7) 0.0145(9) 0.000 0.000 0.0035(4) 
 
_geom_special_details 
; 
 All esds (except the esd in the dihedral angle between two l.s. planes) 
 are estimated using the full covariance matrix.  The cell esds are taken 
 into account individually in the estimation of esds in distances, angles 
 and torsion angles; correlations between esds in cell parameters are only 
 used when they are defined by crystal symmetry.  An approximate (isotropic) 
 treatment of cell esds is used for estimating esds involving l.s. planes. 
; 
 
loop_ 
 _geom_bond_atom_site_label_1 
 _geom_bond_atom_site_label_2 
 _geom_bond_distance 
 _geom_bond_site_symmetry_2 
 _geom_bond_publ_flag 
Yb Au2 3.0874(5) 7_656 ? 
Yb Au2 3.0874(5) 7_655 ? 
Yb Au2 3.0874(5) . ? 
Yb Au2 3.0874(5) 1_556 ? 
Yb Au1 3.1379(15) . ? 
Yb In 3.275(2) . ? 
Yb In 3.275(2) 1_556 ? 
Yb In 3.4094(10) 2_545 ? 
Yb In 3.4094(10) 2_546 ? 
Yb In 3.4094(10) 3_666 ? 
Yb In 3.4094(10) 3_665 ? 
Yb Yb 4.0294(8) 1_554 ? 
Au1 In 2.8339(16) 3_666 ? 
Au1 In 2.8339(16) 1_455 ? 
Au1 In 2.8339(16) 3_665 ? 
Au1 In 2.8339(16) 1_456 ? 
Au1 In 2.8339(16) 2_545 ? 
Au1 In 2.8339(16) 2_546 ? 
Au1 Yb 3.1379(15) 3 ? 
Au1 Yb 3.1380(15) 2 ? 
Au2 In 2.9033(15) 2_545 ? 
Au2 In 2.9033(15) 3_655 ? 
Au2 In 2.9033(15) . ? 
Au2 Yb 3.0874(5) 2_544 ? 
Au2 Yb 3.0874(5) 3_655 ? 
Au2 Yb 3.0874(5) 3_654 ? 
Au2 Yb 3.0874(5) 2_545 ? 
Au2 Yb 3.0875(5) 1_554 ? 
In Au1 2.8339(16) 1_655 ? 
In Au1 2.8339(16) 1_654 ? 
In Au2 2.9033(15) 7_655 ? 
In Yb 3.275(2) 1_554 ? 
In Yb 3.4093(10) 3_654 ? 
In Yb 3.4093(10) 3_655 ? 
In Yb 3.4094(10) 2_655 ? 
In Yb 3.4094(10) 2_654 ? 
 
loop_ 
 _geom_angle_atom_site_label_1 
 _geom_angle_atom_site_label_2 
 _geom_angle_atom_site_label_3 
 _geom_angle 
 _geom_angle_site_symmetry_1 
 _geom_angle_site_symmetry_3 
 _geom_angle_publ_flag 
Au2 Yb Au2 81.468(18) 7_656 7_655 ? 
Au2 Yb Au2 153.09(5) 7_656 . ? 
Au2 Yb Au2 92.297(18) 7_655 . ? 
Au2 Yb Au2 92.297(18) 7_656 1_556 ? 
Au2 Yb Au2 153.09(5) 7_655 1_556 ? 
Au2 Yb Au2 81.468(17) . 1_556 ? 
Au2 Yb Au1 103.46(3) 7_656 . ? 
Au2 Yb Au1 103.46(3) 7_655 . ? 
Au2 Yb Au1 103.46(3) . . ? 
Au2 Yb Au1 103.46(3) 1_556 . ? 
Au2 Yb In 102.59(4) 7_656 . ? 
Au2 Yb In 54.204(19) 7_655 . ? 
Au2 Yb In 54.204(19) . . ? 
Au2 Yb In 102.59(4) 1_556 . ? 
Au1 Yb In 142.03(3) . . ? 
Au2 Yb In 54.20(2) 7_656 1_556 ? 
Au2 Yb In 102.59(4) 7_655 1_556 ? 
Au2 Yb In 102.59(4) . 1_556 ? 
Au2 Yb In 54.20(2) 1_556 1_556 ? 
Au1 Yb In 142.03(3) . 1_556 ? 
In Yb In 75.93(6) . 1_556 ? 
Au2 Yb In 153.75(6) 7_656 2_545 ? 
Au2 Yb In 97.22(3) 7_655 2_545 ? 
Au2 Yb In 52.80(3) . 2_545 ? 
Au2 Yb In 99.60(3) 1_556 2_545 ? 
Au1 Yb In 51.09(3) . 2_545 ? 
In Yb In 97.56(4) . 2_545 ? 
In Yb In 149.17(4) 1_556 2_545 ? 
Au2 Yb In 97.22(3) 7_656 2_546 ? 
Au2 Yb In 153.75(6) 7_655 2_546 ? 
Au2 Yb In 99.60(3) . 2_546 ? 
Au2 Yb In 52.81(3) 1_556 2_546 ? 
Au1 Yb In 51.09(3) . 2_546 ? 
In Yb In 149.17(4) . 2_546 ? 
In Yb In 97.56(4) 1_556 2_546 ? 
In Yb In 72.45(3) 2_545 2_546 ? 
Au2 Yb In 52.81(3) 7_656 3_666 ? 
Au2 Yb In 99.60(3) 7_655 3_666 ? 
Au2 Yb In 153.74(6) . 3_666 ? 
Au2 Yb In 97.22(3) 1_556 3_666 ? 
Au1 Yb In 51.09(3) . 3_666 ? 
In Yb In 149.17(4) . 3_666 ? 
In Yb In 97.56(4) 1_556 3_666 ? 
In Yb In 102.18(7) 2_545 3_666 ? 
In Yb In 60.83(7) 2_546 3_666 ? 
Au2 Yb In 99.60(3) 7_656 3_665 ? 
Au2 Yb In 52.81(3) 7_655 3_665 ? 
Au2 Yb In 97.22(3) . 3_665 ? 
Au2 Yb In 153.75(6) 1_556 3_665 ? 
Au1 Yb In 51.09(3) . 3_665 ? 
In Yb In 97.56(4) . 3_665 ? 
In Yb In 149.17(4) 1_556 3_665 ? 
In Yb In 60.83(7) 2_545 3_665 ? 
In Yb In 102.18(7) 2_546 3_665 ? 
In Yb In 72.45(3) 3_666 3_665 ? 
Au2 Yb Yb 130.734(9) 7_656 1_554 ? 
Au2 Yb Yb 49.266(9) 7_655 1_554 ? 
Au2 Yb Yb 49.266(9) . 1_554 ? 
Au2 Yb Yb 130.734(9) 1_556 1_554 ? 
Au1 Yb Yb 90.0 . 1_554 ? 
In Yb Yb 52.03(3) . 1_554 ? 
In Yb Yb 127.97(3) 1_556 1_554 ? 
In Yb Yb 53.777(13) 2_545 1_554 ? 
In Yb Yb 126.223(13) 2_546 1_554 ? 
In Yb Yb 126.223(13) 3_666 1_554 ? 
In Yb Yb 53.777(13) 3_665 1_554 ? 
In Au1 In 138.82(2) 3_666 1_455 ? 
In Au1 In 90.62(6) 3_666 3_665 ? 
In Au1 In 75.04(5) 1_455 3_665 ? 
In Au1 In 75.04(5) 3_666 1_456 ? 
In Au1 In 90.62(6) 1_455 1_456 ? 
In Au1 In 138.82(2) 3_665 1_456 ? 
In Au1 In 138.83(2) 3_666 2_545 ? 
In Au1 In 75.04(5) 1_455 2_545 ? 
In Au1 In 75.04(5) 3_665 2_545 ? 
In Au1 In 138.83(2) 1_456 2_545 ? 
In Au1 In 75.04(5) 3_666 2_546 ? 
In Au1 In 138.83(2) 1_455 2_546 ? 
In Au1 In 138.83(2) 3_665 2_546 ? 
In Au1 In 75.04(5) 1_456 2_546 ? 
In Au1 In 90.62(6) 2_545 2_546 ? 
In Au1 Yb 134.69(3) 3_666 3 ? 
In Au1 Yb 69.413(12) 1_455 3 ? 
In Au1 Yb 134.69(3) 3_665 3 ? 
In Au1 Yb 69.413(12) 1_456 3 ? 
In Au1 Yb 69.413(12) 2_545 3 ? 
In Au1 Yb 69.413(12) 2_546 3 ? 
In Au1 Yb 69.413(12) 3_666 . ? 
In Au1 Yb 134.69(3) 1_455 . ? 
In Au1 Yb 69.413(12) 3_665 . ? 
In Au1 Yb 134.69(3) 1_456 . ? 
In Au1 Yb 69.413(12) 2_545 . ? 
In Au1 Yb 69.413(12) 2_546 . ? 
Yb Au1 Yb 120.0 3 . ? 
In Au1 Yb 69.412(12) 3_666 2 ? 
In Au1 Yb 69.412(12) 1_455 2 ? 
In Au1 Yb 69.412(12) 3_665 2 ? 
In Au1 Yb 69.412(12) 1_456 2 ? 
In Au1 Yb 134.69(3) 2_545 2 ? 
In Au1 Yb 134.69(3) 2_546 2 ? 
Yb Au1 Yb 120.0 3 2 ? 
Yb Au1 Yb 120.0 . 2 ? 
In Au2 In 119.999(1) 2_545 3_655 ? 
In Au2 In 120.0 2_545 . ? 
In Au2 In 120.0 3_655 . ? 
In Au2 Yb 66.19(3) 2_545 2_544 ? 
In Au2 Yb 69.30(3) 3_655 2_544 ? 
In Au2 Yb 139.217(9) . 2_544 ? 
In Au2 Yb 139.217(10) 2_545 3_655 ? 
In Au2 Yb 66.19(3) 3_655 3_655 ? 
In Au2 Yb 69.30(3) . 3_655 ? 
Yb Au2 Yb 135.473(6) 2_544 3_655 ? 
In Au2 Yb 139.217(10) 2_545 3_654 ? 
In Au2 Yb 66.19(3) 3_655 3_654 ? 
In Au2 Yb 69.30(3) . 3_654 ? 
Yb Au2 Yb 82.026(13) 2_544 3_654 ? 
Yb Au2 Yb 81.468(18) 3_655 3_654 ? 
In Au2 Yb 66.19(3) 2_545 2_545 ? 
In Au2 Yb 69.30(3) 3_655 2_545 ? 
In Au2 Yb 139.217(10) . 2_545 ? 
Yb Au2 Yb 81.468(18) 2_544 2_545 ? 
Yb Au2 Yb 82.026(13) 3_655 2_545 ? 
Yb Au2 Yb 135.473(6) 3_654 2_545 ? 
In Au2 Yb 69.30(3) 2_545 . ? 
In Au2 Yb 139.218(10) 3_655 . ? 
In Au2 Yb 66.19(3) . . ? 
Yb Au2 Yb 135.472(6) 2_544 . ? 
Yb Au2 Yb 82.025(13) 3_655 . ? 
Yb Au2 Yb 135.472(6) 3_654 . ? 
Yb Au2 Yb 82.026(13) 2_545 . ? 
In Au2 Yb 69.30(3) 2_545 1_554 ? 
In Au2 Yb 139.218(10) 3_655 1_554 ? 
In Au2 Yb 66.19(3) . 1_554 ? 
Yb Au2 Yb 82.026(13) 2_544 1_554 ? 
Yb Au2 Yb 135.472(6) 3_655 1_554 ? 
Yb Au2 Yb 82.026(13) 3_654 1_554 ? 
Yb Au2 Yb 135.472(6) 2_545 1_554 ? 
Yb Au2 Yb 81.468(18) . 1_554 ? 
Au1 In Au1 90.62(6) 1_655 1_654 ? 
Au1 In Au2 116.831(5) 1_655 7_655 ? 
Au1 In Au2 116.831(6) 1_654 7_655 ? 
Au1 In Au2 116.831(5) 1_655 . ? 
Au1 In Au2 116.831(5) 1_654 . ? 
Au2 In Au2 100.15(7) 7_655 . ? 
Au1 In Yb 96.72(2) 1_655 . ? 
Au1 In Yb 172.66(6) 1_654 . ? 
Au2 In Yb 59.60(3) 7_655 . ? 
Au2 In Yb 59.60(3) . . ? 
Au1 In Yb 172.66(6) 1_655 1_554 ? 
Au1 In Yb 96.72(2) 1_654 1_554 ? 
Au2 In Yb 59.60(3) 7_655 1_554 ? 
Au2 In Yb 59.60(3) . 1_554 ? 
Yb In Yb 75.93(6) . 1_554 ? 
Au1 In Yb 109.43(5) 1_655 3_654 ? 
Au1 In Yb 59.50(3) 1_654 3_654 ? 
Au2 In Yb 133.71(5) 7_655 3_654 ? 
Au2 In Yb 57.90(2) . 3_654 ? 
Yb In Yb 117.49(4) . 3_654 ? 
Yb In Yb 74.60(2) 1_554 3_654 ? 
Au1 In Yb 59.50(3) 1_655 3_655 ? 
Au1 In Yb 109.43(5) 1_654 3_655 ? 
Au2 In Yb 133.71(5) 7_655 3_655 ? 
Au2 In Yb 57.90(2) . 3_655 ? 
Yb In Yb 74.60(3) . 3_655 ? 
Yb In Yb 117.49(4) 1_554 3_655 ? 
Yb In Yb 72.45(3) 3_654 3_655 ? 
Au1 In Yb 59.50(3) 1_655 2_655 ? 
Au1 In Yb 109.43(5) 1_654 2_655 ? 
Au2 In Yb 57.90(2) 7_655 2_655 ? 
Au2 In Yb 133.72(5) . 2_655 ? 
Yb In Yb 74.60(2) . 2_655 ? 
Yb In Yb 117.49(4) 1_554 2_655 ? 
Yb In Yb 165.71(8) 3_654 2_655 ? 
Yb In Yb 105.70(3) 3_655 2_655 ? 
Au1 In Yb 109.43(5) 1_655 2_654 ? 
Au1 In Yb 59.50(3) 1_654 2_654 ? 
Au2 In Yb 57.90(2) 7_655 2_654 ? 
Au2 In Yb 133.72(5) . 2_654 ? 
Yb In Yb 117.49(4) . 2_654 ? 
Yb In Yb 74.60(2) 1_554 2_654 ? 
Yb In Yb 105.70(3) 3_654 2_654 ? 
Yb In Yb 165.71(8) 3_655 2_654 ? 
Yb In Yb 72.45(3) 2_655 2_654 ? 
 
_diffrn_measured_fraction_theta_max    0.995 
_diffrn_reflns_theta_full              34.27 
_diffrn_measured_fraction_theta_full   0.995 
_refine_diff_density_max    4.004 
_refine_diff_density_min   -2.994 
_refine_diff_density_rms    0.705 
